# Supplementary material for: Genome-Wide Assessment of AU-Rich Elements by the AREScore Algorithm
Source: PubMed Central journal article supplement (PMC3252268; doi:10.1371/journal.pgen.1002433), 2012-01-05
Supplement: pgen.1002433.s006.pdf [file pgen.1002433.s006.pdf]

**Table S1.** Comparison of AREScore between TTP-associated mRNAs and mouse transcriptome

|                      | AREScore   |      |       |
|----------------------|------------|------|-------|
|                      | <4         | ≥4   |       |
| Mouse transcriptome  | 15461      | 4372 | 19833 |
| TTP-associated mRNAs | 31         | 104  | 135   |
|                      | 15492      | 4476 | 19968 |
| $\chi^2$ -test       | p < 0.0001 |      |       |
