# Supplementary material for: Genome-Wide Assessment of AU-Rich Elements by the AREScore Algorithm
Source: PubMed Central journal article supplement (PMC3252268; doi:10.1371/journal.pgen.1002433), 2012-01-05
Supplement: pgen.1002433.s010.pdf [file pgen.1002433.s010.pdf]

**Table S5.** Oligonucleotides used for dsRNA synthesis templates

| Gene  | Oligo | Sequence (5'-3')                                    |
|-------|-------|-----------------------------------------------------|
| Tis11 | G1258 | gtcatttaggtgacactatagaatactagccaattctatctgccgc      |
|       | G1259 | gtcatttaggtgacactatagaatacggcctgaccgatgatcatgc      |
| GFP   | G1244 | gtcatttaggtgacactatagaatacaccctcgtgaccaccctg        |
|       | G1245 | gtcatttaggtgacactatagaatacggaccatgtgatcgcgct        |
| Rox8  | G1173 | gtcatttaggtgacactatagccggtgtaaaggggaagtcaa          |
|       | G1174 | gtcatttaggtgacactatagctggtgctgcgtcatcatct           |
| AGO1  | G1398 | gtcatttaggtgacactatagaatacggcaatcgatgggttc          |
|       | G1399 | gtcatttaggtgacactatagaatacatgatggaggtacga           |
| AGO2  | G1205 | gtcatttaggtgacactatagaatacctggtgactcgaccattg        |
|       | G1206 | gtcatttaggtgacactatagaatacaacttcatgccatccatg        |
| Lsm1  | G1201 | gtcatttaggtgacactatagaatactggacgacttaaataccgctggc   |
|       | G1202 | gtcatttaggtgacactatagaatacttagcagaagtcctcgttgattatg |
| Pcm   | G1203 | gtcatttaggtgacactatagaatactgggcggtcccaagttctttcgc   |
|       | G1204 | gtcatttaggtgacactatagaatacggaccagggtgcagcaggaagaag  |
| Not1  | G1582 | gtcatttaggtgacactatagaatacccggttaagttggtg           |
|       | G1583 | gtcatttaggtgacactatagaatactgaagctggaaaagtg          |
