# Supplementary material for: Genome-Wide Assessment of AU-Rich Elements by the AREScore Algorithm
Source: PLoS Genet. 2012 Jan 5;8(1):e1002433. doi: 10.1371/journal.pgen.1002433 (PMC3252268; doi:10.1371/journal.pgen.1002433)
Supplement: Table S3 — Comparison of AREScore between Tis11-sensitive mRNAs and D. melanogaster transcriptome. (PDF) [file pgen.1002433.s008.pdf]

**Table S3.** Comparison of AREScore between Tis11-sensitive mRNAs and *D. melanogaster* transcriptome

|                                 | AREScore   |      |       |
|---------------------------------|------------|------|-------|
|                                 | <4         | ≥4   |       |
| <i>Drosophila</i> transcriptome | 9359       | 1970 | 11329 |
| Tis11-sensitive mRNAs           | 32         | 17   | 49    |
|                                 | 9391       | 1987 | 11378 |
| $\chi^2$ -test                  | p = 0.0011 |      |       |
